# Supplementary material for: Cancer prevention recommendations: awareness in a Mexican public hospital
Source: PeerJ. 2024 Jul 11;12:e17593. doi: 10.7717/peerj.17593 (PMC11246616; doi:10.7717/peerj.17593)
Supplement: Supplemental Information 3 [file peerj-12-17593-s003.xlsx]

## Sheet: Trujillo
NUMBER	Sex	Age	Partner	Skills	Years of education	Ocuppation	Homemarker	Income por person	Poverty	Quesion 1	Question 2	Question 3	Question 4	Question 5	Question 6	Question 7	Question 8	Question 9	Question 10	Question 11	Question 12	Question 13	Question 14	Global (0-14 poinst)	Question 15	Question 16	Groups	BMI	Question 17	Question 18
161	1	27	1	1	1	13	1	3000	1	0	1	1	1	1	1	1	1	0	0	0	1	0	0	8	1	0	0	32.3884	0	0
266	2	26	0	1	1	11	1	4000	1	0	1	1	1	1	1	1	1	1	1	0	1	0	0	10	0	0	0	25.9095	0	0
242	1	24	1	1	1	5	1	3333.33	1	0	0	1	1	0	1	1	1	0	0	0	1	1	0	7	1	0	0	23.6244	0	0
253	1	71	0	1	0	8	1	600	0	1	1	1	1	0	1	1	1	1	1	1	1	1	0	12	1	0	0	27.3437	0	0
60	2	69	1	1	0	3	1	2000	0	1	1	1	1	1	1	1	1	1	1	1	1	1	1	14	1	0	0	28.4444	0	0
231	2	72	1	1	0	3	1	600	0	1	1	1	1	1	1	1	1	1	1	1	1	0	0	12	1	0	0	25.1039	1	0
62	2	71	1	0	0	3	1	1200	0	1	1	1	1	1	1	1	1	1	1	1	1	1	1	14	1	0	0	25.3515	1	0
80	1	18	1	1	0	5	1	800	0	0	1	1	1	0	1	1	1	0	0	1	1	1	0	9	1	0	0	21.0007	1	0
176	1	20	0	1	1	5	1	2000	0	0	0	1	1	1	1	1	1	0	1	1	1	1	0	10	1	0	0	18.6709	1	0
19	2	68	0	1	0	3	1	1000	0	0	0	1	1	1	1	1	1	1	1	1	1	0	1	11	1	0	0	23.0112	1	0
147	1	35	0	1	1	5	1	5500	1	0	1	1	1	1	1	1	1	1	1	1	1	1	0	12	1	0	0	33.2265	1	0
299	1	43	0	1	0	2	0	375	0	0	0	1	1	0	0	1	0	0	1	1	1	1	1	8	0	1	0	29.5159	1	0
158	1	65	1	0	0	2	0	400	0	1	0	1	1	1	1	1	1	1	1	1	1	1	0	12	0	0	0	28.229	1	0
257	2	40	1	1	0	4	1	2000	0	1	0	1	1	1	1	1	1	0	1	1	1	1	1	12	0	0	0	26.4915	1	0
137	2	44	0	1	0	4	1	1333.33	0	0	0	1	1	1	1	1	1	0	1	1	0	1	1	10	1	0	0	24.2187	0	1
199	1	61	0	1	0	2	0	1500	0	0	0	1	1	0	1	1	1	1	1	0	1	1	1	10	0	1	0	32.6905	0	1
144	1	47	0	1	0	2	0	1800	0	0	1	1	1	0	1	1	1	1	0	0	1	0	1	9	1	0	0	24.974	0	1
28	1	31	1	1	1	5	1	1166.67	0	0	1	1	1	0	1	1	1	1	1	1	1	1	1	12	1	0	0	23.1111	0	1
202	2	63	1	1	0	3	1	500	0	0	0	1	1	1	1	1	1	0	1	1	1	0	0	9	0	0	0	25.8166	0	1
14	1	30	1	1	0	2	0	800	0	0	1	1	1	1	1	0	1	1	1	0	0	1	1	10	1	0	0	27.824	0	1
179	1	29	1	1	0	2	0	600	0	0	0	0	1	0	1	1	0	0	0	0	1	1	0	5	1	0	0	24.0346	1	1
141	1	19	1	1	0	2	0	166.667	0	0	0	1	1	0	1	1	0	0	0	0	1	1	0	6	1	0	0	19.2234	1	1
146	2	78	1	1	0	3	1	366.667	0	0	0	1	1	0	1	1	0	0	0	0	1	1	0	6	0	0	0	22.8928	1	1
91	1	51	0	1	0	2	0	3200	1	0	0	1	1	0	1	1	0	0	1	0	1	0	1	7	1	0	0	24.3232	1	1
2	1	31	1	1	1	2	0	3000	1	0	0	1	1	1	1	1	1	0	0	0	1	0	1	8	1	0	0	24.4418	1	1
67	2	60	1	1	0	11	1	2857.14	1	0	0	1	0	0	1	1	1	1	1	0	1	0	1	8	1	0	0	20.0474	1	1
34	1	71	1	1	0	2	0	750	0	1	0	1	1	1	1	1	0	1	0	1	1	0	0	9	1	0	0	23.3056	1	1
52	1	34	0	1	1	10	1	1125	0	0	0	1	1	1	1	1	1	0	1	0	1	0	1	9	1	0	0	22.3133	1	1
58	1	22	0	1	1	5	1	1250	0	0	0	1	1	1	1	1	1	0	1	0	1	1	0	9	1	0	0	19.6506	1	1
190	1	60	0	1	0	2	0	1333.33	0	0	0	1	1	0	1	1	1	1	1	0	1	0	1	9	1	0	0	23.5556	1	1
261	1	19	1	1	0	5	1	2000	0	0	0	1	1	1	1	1	1	0	0	1	1	1	0	9	1	0	0	24.4561	1	1
18	1	29	1	1	0	2	0	400	0	0	0	1	1	1	1	1	1	1	1	1	0	0	1	10	1	0	0	24.1415	1	1
68	2	52	1	1	1	10	1	1666.67	0	0	0	1	1	1	1	1	1	0	1	0	1	1	1	10	1	0	0	23.4236	1	1
140	2	37	1	1	0	3	1	500	0	0	0	1	1	1	0	1	1	1	1	0	1	1	1	10	1	0	0	22.7694	1	1
148	1	32	1	1	1	5	1	2000	0	0	1	1	1	0	1	1	0	1	1	1	0	1	1	10	1	0	0	21.1553	1	1
187	1	73	1	1	0	2	0	800	0	0	0	1	1	0	1	1	1	1	1	1	1	1	0	10	1	0	0	21.3333	1	1
221	1	42	1	1	0	2	0	500	0	0	1	1	0	1	0	1	1	1	1	1	1	0	1	10	1	0	0	22.8624	1	1
265	1	37	0	1	0	10	1	666.667	0	1	1	1	1	1	1	1	1	0	0	0	1	1	0	10	1	0	0	22.8928	1	1
283	1	34	0	1	1	5	1	375	0	0	1	1	1	1	0	1	1	1	1	1	1	0	0	10	1	0	0	23.1911	1	1
285	1	33	0	1	1	5	1	4000	1	0	0	1	1	1	1	1	1	0	1	1	1	1	0	10	1	0	0	22.3478	1	1
295	1	23	0	1	1	2	0	1000	0	0	1	1	1	0	1	1	1	0	0	1	1	1	1	10	1	0	0	22.6667	1	1
300	1	28	0	1	1	2	0	2857.14	1	1	1	1	0	1	1	1	1	1	0	0	1	1	0	10	1	0	0	20	1	1
38	2	44	1	1	1	8	1	1833.33	0	1	1	1	1	1	1	1	1	0	1	0	1	1	0	11	1	0	0	24.3824	1	1
142	1	20	0	1	0	5	1	2000	0	0	0	1	1	1	1	1	1	1	1	1	1	1	0	11	1	0	0	19.5312	1	1
153	1	39	1	1	0	2	0	375	0	0	0	1	1	1	1	1	1	0	1	1	1	1	1	11	1	0	0	20	1	1
162	1	18	0	1	0	5	1	500	0	0	1	1	1	1	1	1	1	0	0	1	1	1	1	11	1	0	0	23.7332	1	1
248	1	23	0	1	1	5	1	625	0	0	0	1	1	1	1	1	1	1	1	1	1	1	0	11	1	0	0	22.9874	1	1
32	1	40	0	1	0	2	0	400	0	0	0	1	1	1	1	1	1	1	1	1	1	1	1	12	1	0	0	23.7332	1	1
57	1	55	1	1	0	2	0	350	0	0	0	1	1	1	1	1	1	1	1	1	1	1	1	12	0	0	0	23.4224	1	1
66	1	26	1	1	1	2	0	1666.67	0	0	0	1	1	1	1	1	1	1	1	1	1	1	1	12	0	1	0	21.9289	1	1
96	1	51	0	1	0	2	0	666.667	0	0	1	1	1	1	1	1	1	1	1	1	1	0	1	12	1	0	0	24.4444	1	1
106	1	67	1	0	0	2	0	600	0	1	0	1	1	1	1	1	1	1	1	1	1	0	1	12	1	0	0	21.4286	1	1
115	1	24	0	1	1	5	1	750	0	0	0	1	1	1	1	1	1	1	1	1	1	1	1	12	1	0	0	23.7118	1	1
194	2	86	0	1	0	8	1	1000	0	0	0	1	1	1	1	1	1	1	1	1	1	1	1	12	1	0	0	24.3824	1	1
224	1	24	1	1	0	2	0	260	0	0	1	1	1	1	1	1	1	1	1	1	1	0	1	12	1	0	0	22.7076	1	1
275	1	54	0	1	0	2	0	2000	0	0	1	1	1	1	1	1	1	1	1	1	1	0	1	12	0	1	0	24.3948	1	1
16	1	62	1	1	1	2	0	750	0	1	0	1	1	1	1	1	1	1	1	1	1	1	1	13	1	0	0	22.5827	1	1
70	2	68	1	1	0	3	1	750	0	1	0	1	1	1	1	1	1	1	1	1	1	1	1	13	1	0	0	22.3214	1	1
279	1	21	0	1	1	5	1	1800	0	0	1	1	1	1	1	1	1	1	1	1	1	1	1	13	1	0	0	22.3081	1	1
208	2	74	1	1	1	17	1	8000	1	1	1	1	1	1	1	1	1	1	1	1	1	1	1	14	1	0	0	20.1348	1	1
216	1	40	0	1	1	2	0	187.5	0	1	1	1	1	1	1	1	1	1	1	1	1	1	1	14	0	0	0	22.5896	1	1
197	1	31	1	1	0	2	0	2000	0	0	0	1	1	0	1	1	0	0	0	0	1	1	0	6	1	0	0	32.4547	1	1
21	1	18	0	1	0	5	1	2000	0	0	0	1	1	0	1	1	1	0	0	1	1	1	1	9	1	0	0	31.2213	1	1
94	1	49	1	1	0	4	1	666.667	0	0	0	1	1	1	1	1	1	1	0	0	1	1	0	9	1	0	0	33.3276	1	1
44	1	88	1	1	1	9	1	7500	1	0	0	1	1	1	0	0	1	1	1	1	1	1	1	10	1	0	0	30.3593	1	1
284	1	30	1	1	1	2	0	300	0	0	0	1	1	1	1	1	1	1	0	0	1	1	1	10	0	1	0	30.44	1	1
79	1	57	1	1	0	2	0	1000	0	0	0	1	1	1	1	1	1	1	1	1	1	1	0	11	1	0	0	32.8567	1	1
84	1	45	1	1	0	2	0	1500	0	0	0	1	1	1	1	1	1	1	1	0	1	1	1	11	0	0	0	30.44	1	1
150	1	56	1	1	1	2	0	500	0	0	0	1	1	1	1	1	1	1	1	0	1	1	1	11	0	1	0	30.0781	1	1
181	2	54	0	1	0	1	1	1500	0	0	0	1	1	1	1	1	1	0	1	1	1	1	1	11	1	0	0	32.05	1	1
233	1	72	1	1	0	2	0	571.429	0	0	0	1	1	0	1	1	1	1	1	1	1	1	1	11	0	1	0	32.0291	1	1
37	1	67	1	0	0	2	0	333.333	0	0	1	1	1	1	1	1	1	0	1	1	1	1	1	12	1	0	0	30.2978	1	1
54	1	50	0	1	0	2	0	250	0	1	1	1	1	1	1	1	1	0	1	1	1	0	1	12	0	1	0	30.0781	1	1
78	1	37	0	1	1	2	0	500	0	0	0	1	1	1	1	1	1	1	1	1	1	1	1	12	0	1	0	32.8473	1	1
235	2	48	0	1	1	19	1	2500	1	0	1	1	1	1	1	1	1	1	1	1	1	1	0	12	0	1	0	31.8616	1	1
243	2	81	0	1	0	1	1	2000	0	0	0	1	1	1	1	1	1	1	1	1	1	1	1	12	1	0	0	33.3333	1	1
156	1	32	0	1	0	4	1	1500	0	1	1	1	1	1	1	1	1	1	1	0	1	1	1	13	1	0	0	30.1788	1	1
210	2	39	0	1	0	3	1	400	0	1	1	1	1	1	1	1	1	0	1	1	1	1	1	13	1	0	0	32.872	1	1
291	2	40	1	1	0	3	1	1250	0	1	1	1	1	1	1	1	1	1	1	1	1	0	1	13	1	0	0	30.4687	1	1
244	1	49	1	1	0	2	0	666.667	0	1	1	1	1	1	1	1	1	1	1	1	1	1	1	14	1	0	0	31.6118	1	1
227	1	55	1	0	0	2	0	666.667	0	0	0	1	1	0	1	1	0	0	0	0	1	1	0	6	0	0	0	35.1562	1	1
172	1	36	1	1	0	2	0	500	0	0	0	1	1	1	1	1	1	0	0	1	0	1	1	9	1	0	0	35.796	1	1
220	1	63	0	1	0	2	0	900	0	0	1	1	1	0	1	1	1	1	0	0	1	1	0	9	1	0	0	37.3333	1	1
292	1	69	1	1	0	2	0	250	0	1	1	1	1	1	1	1	1	0	1	1	1	1	1	13	1	0	0	37.0987	1	1
53	1	44	0	1	0	2	0	300	0	1	0	1	1	1	0	1	0	1	0	0	0	1	1	8	1	0	0	44.634	1	1
83	1	28	1	1	0	2	0	325	0	1	1	1	1	1	1	1	1	0	0	0	1	1	1	11	1	0	0	40.0573	1	1
226	1	60	1	1	0	2	0	666.667	0	1	1	1	1	1	1	1	1	1	1	1	1	0	1	13	1	0	0	42.1543	1	1
51	1	20	0	1	0	5	1	625	0	0	0	1	1	1	1	1	1	0	0	0	1	1	1	9	1	0	0	17.7778	1	1
81	1	19	0	1	1	5	1	2250	0	0	1	1	1	1	1	1	1	0	1	1	1	1	0	11	0	1	0	16.8889	1	1
232	1	41	1	1	0	2	0	1000	0	0	0	1	1	0	0	1	0	0	0	1	1	0	1	6	0	0	0	26.1719	1	1
22	1	35	1	1	0	5	1	400	0	0	0	1	1	0	1	1	1	0	0	1	0	1	1	8	1	0	0	25.3906	1	1
175	1	37	0	1	0	2	0	1666.67	0	0	0	1	1	1	0	0	1	1	0	1	0	1	1	8	0	0	0	27.5134	1	1
251	1	52	1	1	1	2	0	500	0	0	0	1	1	0	1	1	0	0	1	0	1	1	1	8	1	0	0	29.2184	1	1
5	1	37	0	1	0	2	0	333.333	0	0	1	1	1	0	1	0	1	0	1	0	1	1	1	9	1	0	0	26.1556	1	1
35	1	63	0	1	0	2	0	500	0	0	1	0	1	1	1	1	1	1	0	0	1	1	0	9	0	1	0	28.9341	1	1
56	1	40	1	1	0	2	0	1500	0	0	0	1	1	1	0	1	1	0	1	0	1	1	1	9	1	0	0	27.31	1	1
76	2	32	1	1	0	3	1	2000	0	0	0	1	1	0	1	1	1	1	1	0	1	1	0	9	0	0	0	27.7323	1	1
200	1	76	0	1	0	4	1	1000	0	0	0	1	1	0	1	1	1	0	1	1	1	1	0	9	0	0	0	26.1593	1	1
203	1	40	1	1	0	2	0	1000	0	0	0	1	0	0	1	1	1	1	1	0	1	1	1	9	1	0	0	25.1096	1	1
277	2	72	1	1	0	3	1	750	0	0	1	1	1	0	1	1	1	0	1	1	1	0	0	9	0	0	0	28.125	1	1
4	2	63	1	1	0	3	1	1000	0	1	1	1	0	1	0	1	1	1	1	0	1	1	0	10	1	0	0	26.6667	1	1
42	1	18	1	1	0	2	0	625	0	0	1	1	1	1	0	1	1	0	0	1	1	1	1	10	1	0	0	25	1	1
263	1	40	0	1	1	4	1	666.667	0	0	0	1	1	0	1	1	0	1	1	1	1	1	1	10	1	0	0	27.8876	1	1
65	1	39	1	1	0	2	0	400	0	0	1	1	1	0	1	1	1	1	1	1	1	0	1	11	1	0	0	29.7056	1	1
167	2	53	1	1	0	15	1	3000	1	0	0	1	1	1	1	1	1	1	1	1	1	0	1	11	1	0	0	25.8166	1	1
298	1	52	1	1	0	15	1	2500	1	0	1	1	1	1	1	1	1	1	1	1	1	0	0	11	1	0	0	29.7339	1	1
69	1	28	1	1	0	2	0	500	0	1	1	0	1	1	1	1	1	1	1	1	1	0	1	12	0	1	0	29.7284	1	1
152	1	55	0	1	0	2	0	2000	0	1	1	1	1	1	1	1	1	1	1	0	0	1	1	12	0	1	0	29.1363	1	1
164	1	49	1	1	1	10	1	800	0	0	0	1	1	1	1	1	1	1	1	1	1	1	1	12	1	0	0	29.3333	1	1
188	1	38	1	1	1	2	0	800	0	0	0	1	1	1	1	1	1	1	1	1	1	1	1	12	1	0	0	25.9695	1	1
209	1	50	0	1	1	4	1	2000	0	1	1	1	1	1	1	1	1	1	1	0	1	0	1	12	1	0	0	25.6837	1	1
234	2	36	1	1	1	2	0	1400	0	0	1	1	1	1	1	1	1	0	1	1	1	1	1	12	1	0	0	27.9431	1	1
249	1	51	1	1	0	4	1	1000	0	1	1	1	1	1	0	1	1	1	1	1	1	0	1	12	1	0	0	27.4884	1	1
267	2	62	1	1	1	10	1	2500	1	0	0	1	1	1	1	1	1	1	1	1	1	1	1	12	1	0	0	28.3937	1	1
293	1	36	1	1	0	2	0	500	0	1	1	1	1	0	1	1	1	1	1	1	1	1	0	12	1	0	0	28.8889	1	1
45	2	43	1	1	0	3	1	366.667	0	1	1	1	1	1	1	1	1	1	1	1	1	0	1	13	1	0	0	26.4915	1	1
90	1	50	1	1	1	4	1	1000	0	1	1	1	1	1	1	1	1	1	1	1	1	1	0	13	1	0	0	27.5556	1	1
103	1	23	1	1	0	4	1	1000	0	1	1	1	1	1	1	1	1	1	1	0	1	1	1	13	1	0	0	27.3437	1	1
280	1	76	0	0	0	2	0	1000	0	0	1	1	1	1	1	1	1	1	1	1	1	1	1	13	0	0	0	26.635	1	1
173	2	66	1	1	0	1	1	1200	0	1	1	1	1	1	1	1	1	1	1	1	1	1	1	14	1	0	0	28.9811	1	1
189	1	63	0	1	0	2	0	2500	1	1	1	1	1	1	1	1	1	1	1	1	1	1	1	14	1	0	0	26.5754	1	1
138	2	49	1	0	0	3	1	120	0	0	0	1	1	0	1	0	0	1	1	1	0	1	0	7	1	1	1	26.5625	0	0
1	2	18	0	1	0	1	1	600	0	1	1	1	1	0	1	1	1	1	1	0	1	1	0	11	1	1	1	21.5139	0	0
128	2	33	0	1	0	4	1	1000	0	1	1	1	1	1	1	1	0	0	0	1	1	1	1	11	1	1	1	26.1066	0	0
26	2	38	1	1	0	1	1	1000	0	1	1	1	0	1	1	1	1	1	1	1	1	1	0	12	1	1	1	28.5018	0	0
250	1	32	0	1	1	5	1	833.333	0	0	0	1	1	0	1	1	0	0	0	1	1	1	1	8	1	1	1	19.7134	1	0
113	1	21	0	1	1	5	1	7500	1	1	0	1	1	1	1	1	0	0	1	0	1	1	1	10	1	1	1	22.8624	1	0
64	1	18	0	1	0	5	1	1333.33	0	1	0	0	1	1	1	1	1	0	1	1	1	1	1	11	1	1	1	20.2694	1	0
124	1	20	0	1	1	5	1	500	0	1	1	1	1	1	1	1	1	1	1	1	1	0	0	12	1	1	1	21.3333	1	0
230	2	31	0	1	0	4	1	2000	0	1	1	1	1	1	1	1	1	1	1	1	1	1	1	14	1	1	1	24.0238	1	0
10	1	31	1	1	0	2	0	300	0	1	1	1	1	1	0	0	1	1	0	0	0	1	1	9	1	1	1	29.6427	1	0
133	2	24	0	1	0	4	1	714.286	0	1	0	1	1	0	1	1	1	0	0	1	1	1	0	9	1	1	1	27.3356	1	0
222	2	29	0	1	0	1	1	4800	1	1	1	1	1	0	1	1	1	1	1	1	1	1	0	12	1	1	1	26.5625	1	0
135	1	41	1	1	0	4	1	1000	0	1	1	1	1	1	1	1	1	1	1	1	1	0	1	13	1	1	1	25.5588	1	0
182	1	30	1	1	0	2	0	1400	0	0	1	1	1	1	1	1	1	1	1	1	1	1	1	13	1	1	1	25.5102	1	0
39	1	53	1	1	0	2	0	2000	0	1	0	1	1	0	1	1	1	1	1	1	1	1	0	11	1	1	1	45.1735	0	1
217	1	41	1	1	1	2	0	800	0	0	1	1	1	1	1	1	0	0	1	1	1	1	1	11	1	1	1	29.903	0	1
71	2	75	1	1	0	8	1	714.286	0	1	1	1	1	1	1	1	1	1	1	1	1	1	1	14	1	1	1	29.7442	0	1
223	1	50	1	1	1	2	0	3250	1	1	1	1	1	1	1	1	1	1	1	1	1	1	1	14	1	1	1	28.4444	0	1
108	2	67	0	1	0	4	1	3000	1	1	1	1	1	1	1	1	1	1	1	1	1	1	0	13	1	1	1	21.83	0	1
193	2	71	0	1	0	3	1	1000	0	0	0	1	1	0	1	1	0	0	0	0	1	1	0	6	1	1	1	22.9819	0	1
289	2	58	0	1	0	1	1	500	0	0	1	1	1	1	1	1	0	0	1	1	1	1	0	10	1	1	1	21.7365	0	1
139	1	25	1	1	0	5	1	875	0	1	0	1	1	1	1	1	1	1	1	1	1	0	1	12	1	1	1	28.6851	0	1
93	1	41	0	1	0	4	1	3000	1	0	1	1	1	1	1	1	1	1	1	1	1	1	1	13	1	1	1	29.3333	0	1
40	1	19	1	1	1	5	1	1266.67	0	0	0	1	1	1	0	1	0	0	0	0	1	1	1	7	1	1	1	22.8624	0	1
29	1	44	1	1	0	2	0	625	0	0	0	1	1	0	1	1	1	1	1	1	1	0	1	10	1	1	1	22.8269	0	1
163	2	49	1	1	0	1	1	1000	0	1	1	1	1	1	1	1	1	0	1	1	0	1	0	11	1	1	1	23.6652	0	1
191	1	27	1	1	0	4	1	700	0	0	0	1	1	1	1	1	1	1	1	1	1	1	1	12	1	1	1	22.9591	0	1
246	2	46	1	1	0	4	1	2500	1	0	1	1	1	1	1	1	1	1	1	1	1	1	1	13	1	1	1	37.1652	0	1
160	2	23	0	1	1	3	1	666.667	0	0	0	1	1	1	1	1	1	0	1	0	1	1	1	10	1	1	1	25.7812	0	1
55	1	26	1	1	0	2	0	1000	0	0	0	0	1	0	1	1	0	1	1	1	1	0	0	7	1	1	1	23.3726	1	1
7	1	24	0	1	0	4	1	2500	1	1	0	1	1	1	1	1	1	0	0	0	0	1	0	8	1	1	1	21.0962	1	1
72	2	34	1	1	0	3	1	750	0	0	0	0	1	1	1	1	1	1	0	0	1	1	0	8	1	1	1	20.1951	1	1
129	1	18	0	1	0	5	1	833.333	0	0	1	1	1	0	1	1	0	0	0	1	1	1	0	8	1	1	1	21.875	1	1
117	1	31	1	1	0	2	0	1000	0	0	0	1	1	1	1	1	1	0	1	0	1	1	0	9	1	1	1	23.7812	1	1
215	1	28	1	1	1	5	1	2000	0	0	0	0	0	1	1	1	1	1	1	0	1	1	1	9	1	1	1	23.7253	1	1
262	1	18	1	1	0	5	1	500	0	0	0	1	1	0	1	1	1	0	1	1	1	1	0	9	1	1	1	20.6905	1	1
100	1	26	0	1	0	2	0	750	0	1	0	1	1	1	1	1	1	0	0	1	1	1	0	10	1	1	1	19.4734	1	1
143	1	37	1	1	1	4	1	416.667	0	0	1	1	1	0	1	1	0	1	0	1	1	1	1	10	1	1	1	20.5457	1	1
237	1	32	1	1	0	2	0	1500	0	0	0	1	1	1	1	1	1	1	1	1	1	0	0	10	1	1	1	20.83	1	1
278	1	19	1	1	0	5	1	1333.33	0	0	1	1	1	1	1	1	1	0	0	0	1	1	1	10	1	1	1	19.3685	1	1
27	1	54	0	1	0	2	0	1500	0	0	0	1	1	1	1	1	1	1	1	1	1	1	0	11	1	1	1	23.7387	1	1
46	1	38	0	1	0	2	0	533.333	0	0	0	1	1	1	1	1	1	0	1	1	1	1	1	11	1	1	1	22.0741	1	1
87	1	36	1	1	0	2	0	666.667	0	1	1	1	1	1	1	1	0	0	1	0	1	1	1	11	1	1	1	23.1385	1	1
110	1	73	1	1	0	2	0	500	0	1	1	1	1	1	0	1	1	1	0	1	1	1	0	11	1	1	1	22.9592	1	1
112	1	74	0	1	0	2	0	1000	0	0	0	1	1	1	1	1	1	0	1	1	1	1	1	11	1	1	1	23.7812	1	1
118	1	26	1	1	0	5	1	2666.67	1	0	0	1	1	1	1	1	1	0	1	1	1	1	1	11	1	1	1	22.1453	1	1
119	1	46	0	1	1	5	1	2000	0	1	0	1	1	1	1	1	1	0	1	0	1	1	1	11	1	1	1	22.6562	1	1
126	1	26	1	1	0	2	0	333.333	0	0	0	1	1	0	1	1	1	1	1	1	1	1	1	11	1	1	1	22.0711	1	1
183	1	63	1	1	0	16	1	1000	0	0	0	1	1	1	1	1	1	1	1	1	1	0	1	11	1	1	1	24.8889	1	1
287	1	47	1	1	0	2	0	5000	1	0	1	1	1	1	1	1	1	1	1	1	1	0	0	11	1	1	1	20.6131	1	1
48	1	19	1	1	0	5	1	1000	0	0	1	1	0	1	1	1	1	1	1	1	1	1	1	12	1	1	1	22.2222	1	1
74	1	48	1	1	0	2	0	2500	1	0	1	1	1	1	1	1	1	1	1	0	1	1	1	12	1	1	1	24.3046	1	1
77	1	45	1	1	0	2	0	500	0	0	1	1	1	1	1	1	1	1	1	1	1	0	1	12	1	1	1	19.5312	1	1
95	2	51	1	1	0	8	1	1500	0	1	1	1	1	1	1	1	1	1	1	1	1	0	0	12	1	1	1	24.2187	1	1
98	2	94	0	0	0	3	1	300	0	0	1	1	1	1	1	1	1	0	1	1	1	1	1	12	1	1	1	24.6097	1	1
99	2	26	1	1	0	10	1	1750	0	1	1	1	1	1	1	1	1	1	1	0	1	1	0	12	1	1	1	24.5675	1	1
114	1	18	0	0	0	2	0	333.333	0	0	1	1	1	1	1	1	1	1	1	1	1	1	0	12	1	1	1	24.1415	1	1
123	2	26	1	1	0	10	1	833.333	0	0	1	1	1	1	1	1	1	1	1	1	1	1	0	12	1	1	1	22.806	1	1
130	1	40	0	1	0	2	0	833.333	0	0	1	1	1	1	1	1	1	0	1	1	1	1	1	12	1	1	1	20.9275	1	1
159	1	45	1	1	0	2	0	750	0	1	1	1	1	1	1	1	1	1	1	1	0	0	1	12	1	1	1	23.1385	1	1
166	1	51	1	1	0	2	0	640	0	0	1	1	0	1	1	1	1	1	1	1	1	1	1	12	1	1	1	23.4375	1	1
252	1	19	1	1	1	5	1	1333.33	0	0	1	1	1	1	1	1	1	0	1	1	1	1	1	12	1	1	1	19.7777	1	1
270	2	42	0	1	0	11	1	1500	0	0	0	1	1	1	1	1	1	1	1	1	1	1	1	12	1	1	1	19.1001	1	1
274	1	71	1	1	0	2	0	900	0	0	1	1	1	1	1	1	1	1	1	1	1	0	1	12	1	1	1	24.7676	1	1
281	1	74	1	0	0	2	0	500	0	1	1	1	1	1	1	1	1	1	1	1	1	0	0	12	1	1	1	24.7325	1	1
282	1	20	1	1	1	5	1	3800	1	0	1	1	1	1	1	1	1	0	1	1	1	1	1	12	1	1	1	21.0962	1	1
297	1	18	0	1	1	2	0	1500	0	0	1	1	1	1	1	1	1	1	1	1	1	1	0	12	1	1	1	21.9899	1	1
50	1	30	1	1	1	5	1	2666.67	1	1	1	1	1	1	1	1	1	1	1	1	0	1	1	13	1	1	1	22.3478	1	1
109	2	18	0	1	1	5	1	700	0	0	1	1	1	1	1	1	1	1	1	1	1	1	1	13	1	1	1	19.9219	1	1
131	2	60	0	1	1	14	1	1500	0	1	0	1	1	1	1	1	1	1	1	1	1	1	1	13	1	1	1	24.8016	1	1
154	1	63	0	1	1	4	1	2000	0	1	1	1	1	1	1	1	1	1	1	0	1	1	1	13	1	1	1	20.5688	1	1
178	1	19	1	1	0	5	1	1600	0	1	1	1	1	1	1	1	1	0	1	1	1	1	1	13	1	1	1	20.9566	1	1
185	1	25	1	1	1	5	1	1200	0	0	1	1	1	1	1	1	1	1	1	1	1	1	1	13	1	1	1	24.2187	1	1
256	1	21	1	1	1	5	1	600	0	0	1	1	1	1	1	1	1	1	1	1	1	1	1	13	1	1	1	22.5466	1	1
258	2	92	0	0	0	1	1	3000	1	0	1	1	1	1	1	1	1	1	1	1	1	1	1	13	1	1	1	23.8751	1	1
63	1	25	1	1	1	5	1	2000	0	1	1	1	1	1	1	1	1	1	1	1	1	1	1	14	1	1	1	23.5304	1	1
198	1	32	0	1	1	5	1	500	0	1	1	1	1	1	1	1	1	1	1	1	1	1	1	14	1	1	1	22.5215	1	1
254	2	69	0	0	0	3	1	600	0	1	1	1	1	1	1	1	1	1	1	1	1	1	1	14	1	1	1	23.5294	1	1
9	1	50	0	1	0	2	0	1200	0	1	0	0	1	0	1	0	1	0	1	0	0	0	1	6	1	1	1	30.4687	1	1
111	1	34	1	1	0	2	0	3500	1	0	0	1	1	0	1	1	0	0	0	1	1	1	0	7	1	1	1	30.1021	1	1
33	1	36	1	1	0	2	0	2400	1	0	0	1	0	1	0	0	1	1	1	1	0	1	1	8	1	1	1	32.4661	1	1
101	1	27	0	0	0	2	0	600	0	0	0	1	1	0	1	1	1	0	1	1	1	0	0	8	1	1	1	30.8185	1	1
24	2	43	1	1	0	3	1	1000	0	1	1	0	1	0	1	1	1	0	0	0	1	1	1	9	1	1	1	31.25	1	1
97	1	59	1	1	0	2	0	1000	0	0	0	1	1	0	1	1	1	0	0	1	1	1	1	9	1	1	1	31.5011	1	1
225	1	39	1	1	0	2	0	300	0	0	0	1	1	0	1	1	1	1	1	1	1	0	0	9	1	1	1	33.3205	1	1
296	1	47	1	1	0	4	1	1000	0	0	1	1	1	0	1	1	0	1	1	0	1	1	0	9	1	1	1	30.2978	1	1
3	1	30	1	1	0	2	0	500	0	0	0	1	1	1	1	1	1	0	1	1	1	1	0	10	1	1	1	31.2295	1	1
186	1	44	1	1	0	2	0	933.333	0	0	0	1	1	0	1	1	1	1	1	1	1	1	0	10	1	1	1	34.7153	1	1
205	1	32	1	1	0	2	0	200	0	0	1	1	1	0	1	1	1	1	1	1	0	1	0	10	1	1	1	33.3318	1	1
273	1	43	1	1	0	10	1	1500	0	1	1	1	1	1	1	1	1	1	1	0	0	0	0	10	1	1	1	34.9277	1	1
286	1	54	0	1	0	2	0	1000	0	0	0	0	1	1	1	1	1	1	1	1	1	1	0	10	1	1	1	34.375	1	1
41	1	62	0	1	0	2	0	500	0	0	1	1	1	1	1	1	1	1	1	1	0	0	1	11	1	1	1	33.3108	1	1
82	1	50	1	1	1	12	1	2666.67	1	1	0	1	1	0	1	1	1	1	1	0	1	1	1	11	1	1	1	31.6404	1	1
174	1	42	1	1	0	2	0	700	0	0	0	1	1	1	1	1	1	0	1	1	1	1	1	11	1	1	1	32.8892	1	1
192	1	62	0	1	0	10	1	1000	0	1	1	1	1	1	1	1	1	1	1	0	0	0	1	11	1	1	1	32.311	1	1
207	2	49	1	1	0	3	1	1200	0	0	0	1	1	1	1	1	1	1	1	1	1	0	1	11	1	1	1	31.4879	1	1
229	1	41	1	1	0	4	1	600	0	0	0	1	1	1	1	1	1	1	1	1	1	0	1	11	1	1	1	32.0073	1	1
85	1	31	1	1	0	2	0	171.429	0	0	1	1	1	1	1	1	1	1	1	1	1	0	1	12	1	1	1	31.5301	1	1
151	1	36	1	1	0	4	1	1166.67	0	0	0	1	1	1	1	1	1	1	1	1	1	1	1	12	1	1	1	32.7449	1	1
157	1	49	0	1	0	4	1	333.333	0	0	1	1	1	1	1	1	1	1	1	1	1	1	0	12	1	1	1	31.9576	1	1
165	1	39	1	1	0	2	0	1333.33	0	0	0	1	1	1	1	1	1	1	1	1	1	1	1	12	1	1	1	31.25	1	1
196	1	40	1	1	0	2	0	500	0	1	1	1	1	1	1	1	1	1	1	1	1	0	0	12	1	1	1	31.9922	1	1
236	2	52	1	0	0	3	1	640	0	0	0	1	1	1	1	1	1	1	1	1	1	1	1	12	1	1	1	33.0237	1	1
75	2	59	1	0	0	3	1	625	0	1	1	1	1	1	1	1	1	1	1	1	1	1	0	13	1	1	1	34.9277	1	1
105	1	33	0	1	1	5	1	1666.67	0	1	1	1	1	1	1	1	1	1	1	0	1	1	1	13	1	1	1	30.4687	1	1
107	1	57	1	1	0	2	0	600	0	1	1	1	1	1	1	1	1	1	1	1	1	0	1	13	1	1	1	33.5635	1	1
120	1	46	1	1	0	2	0	400	0	1	1	1	1	1	1	1	1	1	1	1	1	0	1	13	1	1	1	32	1	1
122	2	36	1	1	0	10	1	2500	1	1	1	1	1	1	1	1	1	1	1	1	1	0	1	13	1	1	1	32.526	1	1
13	1	26	1	1	1	5	1	1333.33	0	1	1	1	1	1	1	1	1	1	1	1	1	1	1	14	1	1	1	30.4687	1	1
88	1	50	1	1	0	2	0	833.333	0	1	1	1	1	1	1	1	1	1	1	1	1	1	1	14	1	1	1	34.7222	1	1
102	1	55	0	1	0	2	0	1200	0	1	1	1	1	1	1	1	1	1	1	1	1	1	1	14	1	1	1	32.4444	1	1
86	1	48	1	1	0	2	0	222.222	0	0	0	1	1	0	1	1	1	0	1	0	1	1	0	8	1	1	1	36.8851	1	1
195	2	19	0	1	1	5	1	2000	0	0	1	1	1	1	1	1	1	0	0	1	1	1	0	10	1	1	1	35.8342	1	1
213	1	31	1	1	1	2	0	800	0	0	0	1	1	1	1	1	0	1	1	0	1	1	1	10	1	1	1	35.6986	1	1
169	1	60	0	1	0	10	1	2666.67	1	1	0	1	1	1	1	1	1	1	1	0	1	0	1	11	1	1	1	36.6285	1	1
170	1	51	1	0	0	2	0	500	0	0	0	1	1	1	1	1	1	1	1	0	1	1	1	11	1	1	1	38.7755	1	1
155	1	61	1	1	0	2	0	500	0	1	1	1	1	1	1	1	1	1	1	1	0	1	1	13	1	1	1	37.5	1	1
127	1	35	0	1	1	5	1	1000	0	1	1	1	0	1	1	1	0	1	1	1	1	1	1	12	1	1	1	47.8377	1	1
245	1	38	0	1	0	2	0	666.667	0	1	1	1	1	1	1	1	1	0	1	1	1	1	1	13	1	1	1	41.3223	1	1
259	1	58	0	1	0	10	1	1500	0	1	1	1	1	1	1	1	1	1	1	1	1	1	1	14	1	1	1	48.196	1	1
49	1	25	1	1	1	5	1	2000	0	0	0	1	0	0	1	1	0	0	1	0	0	0	0	4	1	1	1	17.898	1	1
201	1	31	1	1	0	2	0	800	0	1	0	1	1	1	1	1	1	0	1	1	1	1	0	11	1	1	1	18.3143	1	1
212	1	31	0	1	1	18	1	8000	1	0	1	1	1	1	1	1	1	0	0	1	1	1	1	11	1	1	1	17.6309	1	1
171	1	45	0	1	1	4	1	5000	1	0	1	1	1	1	1	1	1	1	1	1	1	0	1	12	1	1	1	18.3594	1	1
92	1	25	0	1	1	2	0	1500	0	1	1	1	1	1	1	1	1	1	1	0	1	1	1	13	1	1	1	18.0802	1	1
17	1	38	1	1	0	2	0	1750	0	0	1	0	1	1	1	1	0	0	0	0	1	1	0	7	1	1	1	26.1593	1	1
104	2	20	0	1	0	2	0	2666.67	1	0	0	1	1	0	1	1	1	0	0	0	1	1	0	7	1	1	1	27.4406	1	1
31	1	45	1	1	0	2	0	1333.33	0	0	0	0	1	0	1	1	1	0	0	1	1	1	1	8	1	1	1	26.0226	1	1
6	1	64	0	0	0	2	0	500	0	1	1	1	1	0	0	1	1	1	1	0	1	0	0	9	1	1	1	26.5306	1	1
8	1	18	1	1	0	5	1	2000	0	0	1	1	1	0	1	1	1	0	0	1	0	1	1	9	1	1	1	29.2969	1	1
132	1	26	1	1	0	5	1	400	0	0	0	1	1	0	1	1	1	1	1	1	1	0	0	9	1	1	1	27.3437	1	1
255	1	39	1	1	0	4	1	1000	0	0	0	1	1	1	1	1	1	1	1	0	1	0	0	9	1	1	1	29.3333	1	1
20	1	48	1	1	1	6	1	625	0	0	1	1	1	1	1	1	1	0	0	1	1	0	1	10	1	1	1	25.9695	1	1
43	1	27	1	1	0	2	0	1000	0	0	1	1	1	1	0	0	1	1	1	1	1	0	1	10	1	1	1	25.3906	1	1
116	2	65	1	1	0	1	1	1000	0	0	0	1	1	0	1	1	1	1	1	1	1	0	1	10	1	1	1	25.8876	1	1
136	2	68	1	1	0	4	1	1500	0	0	0	1	0	1	1	1	1	1	1	1	1	0	1	10	1	1	1	26.8977	1	1
219	1	24	0	1	1	5	1	1000	0	0	0	1	1	1	1	1	1	1	1	1	1	0	0	10	1	1	1	25.1039	1	1
23	1	50	1	1	1	2	0	833.333	0	0	0	1	1	1	1	1	1	1	1	1	1	0	1	11	1	1	1	27.1809	1	1
47	1	30	1	1	0	2	0	1500	0	0	1	1	1	1	0	1	1	1	1	1	1	0	1	11	1	1	1	25.462	1	1
145	1	39	1	1	0	2	0	250	0	1	0	1	1	0	1	1	0	1	1	1	1	1	1	11	1	1	1	28.1943	1	1
180	1	39	1	1	0	4	1	1000	0	1	1	1	1	1	1	1	1	0	0	0	1	1	1	11	1	1	1	26.635	1	1
214	1	63	1	1	1	2	0	4000	1	1	1	1	1	0	0	1	1	1	1	0	1	1	1	11	1	1	1	28.1625	1	1
12	1	62	1	1	0	2	0	625	0	1	1	1	1	1	1	1	1	1	1	1	0	0	1	12	1	1	1	26.1593	1	1
30	1	18	0	1	0	5	1	1200	0	1	1	1	1	1	1	1	1	1	0	0	1	1	1	12	1	1	1	29.2421	1	1
206	1	39	1	1	0	2	0	750	0	1	0	1	1	1	1	1	1	1	1	1	1	0	1	12	1	1	1	27.6361	1	1
211	1	43	0	1	1	4	1	2000	0	0	1	1	1	0	1	1	1	1	1	1	1	1	1	12	1	1	1	27.1203	1	1
239	2	46	0	1	0	4	1	2400	1	1	1	1	0	1	1	1	1	1	1	1	1	0	1	12	1	1	1	27.1809	1	1
247	1	44	0	1	0	2	0	833.333	0	0	1	1	1	1	1	1	1	1	1	1	1	0	1	12	1	1	1	29.7578	1	1
260	1	77	0	1	0	2	0	1000	0	0	0	1	1	1	1	1	1	1	1	1	1	1	1	12	1	1	1	25.8065	1	1
271	1	45	0	1	0	4	1	2000	0	1	1	1	1	1	0	1	1	1	1	1	1	0	1	12	1	1	1	26.6667	1	1
272	2	71	1	1	0	1	1	650	0	1	1	1	1	1	1	1	1	1	1	1	1	0	0	12	1	1	1	28.5665	1	1
288	1	54	0	1	0	10	1	1400	0	0	1	1	1	1	1	1	1	1	1	1	0	1	1	12	1	1	1	25.9107	1	1
25	1	24	1	1	0	3	1	320	0	1	1	1	1	1	1	1	1	1	0	1	1	1	1	13	1	1	1	26.7804	1	1
59	1	43	1	1	0	2	0	375	0	1	1	1	0	1	1	1	1	1	1	1	1	1	1	13	1	1	1	27.7662	1	1
61	1	69	0	1	0	2	0	2000	0	1	1	1	0	1	1	1	1	1	1	1	1	1	1	13	1	1	1	28.8275	1	1
89	1	26	1	1	1	5	1	2166.67	0	1	1	1	1	1	1	1	1	0	1	1	1	1	1	13	1	1	1	25.4767	1	1
125	2	72	1	1	1	4	1	1500	0	1	1	1	1	1	1	1	1	1	1	1	1	0	1	13	1	1	1	27.6888	1	1
177	2	34	1	1	0	3	1	600	0	1	1	1	1	1	1	1	1	1	1	1	1	0	1	13	1	1	1	24.977	1	1
238	1	61	0	0	0	10	1	300	0	1	1	1	1	1	1	1	1	1	1	1	1	1	0	13	1	1	1	25.9695	1	1
264	2	18	0	1	0	5	1	2666.67	1	1	1	1	1	0	1	1	1	1	1	1	1	1	1	13	1	1	1	26.2596	1	1
268	2	61	1	1	0	3	1	250	0	1	1	1	1	1	1	1	1	1	1	1	1	0	1	13	1	1	1	28.306	1	1
269	2	81	1	0	0	3	1	1700	0	1	1	1	1	1	1	1	1	1	1	1	1	0	1	13	1	1	1	28.9993	1	1
36	2	40	1	1	0	1	1	333.333	0	1	1	1	1	1	1	1	1	1	1	1	1	1	1	14	1	1	1	28.4444	1	1
73	2	22	1	1	1	4	1	266.667	0	1	1	1	1	1	1	1	1	1	1	1	1	1	1	14	1	1	1	26.7229	1	1
121	1	47	1	1	0	2	0	3333.33	1	1	1	1	1	1	1	1	1	1	1	1	1	1	1	14	1	1	1	26.7405	1	1
240	1	25	1	1	1	5	1	2000	0	1	1	1	1	1	1	1	1	1	1	1	1	1	1	14	1	1	1	27.0993	1	1
290	2	62	1	0	0	3	1	500	0	1	1	1	1	1	1	1	1	1	1	1	1	1	1	14	1	1	1	29.5553	1	1
294	1	53	1	1	1	2	0	1250	0	1	1	1	1	1	1	1	1	1	1	1	1	1	1	14	1	1	1	28.9062	1	1
